# Supplementary material
Source: ML conference proceedings conference paper supplement (https://openreview.net/forum?id=_MRiKN8-sw)

Multivariate Gaussian dataset [1000x5]

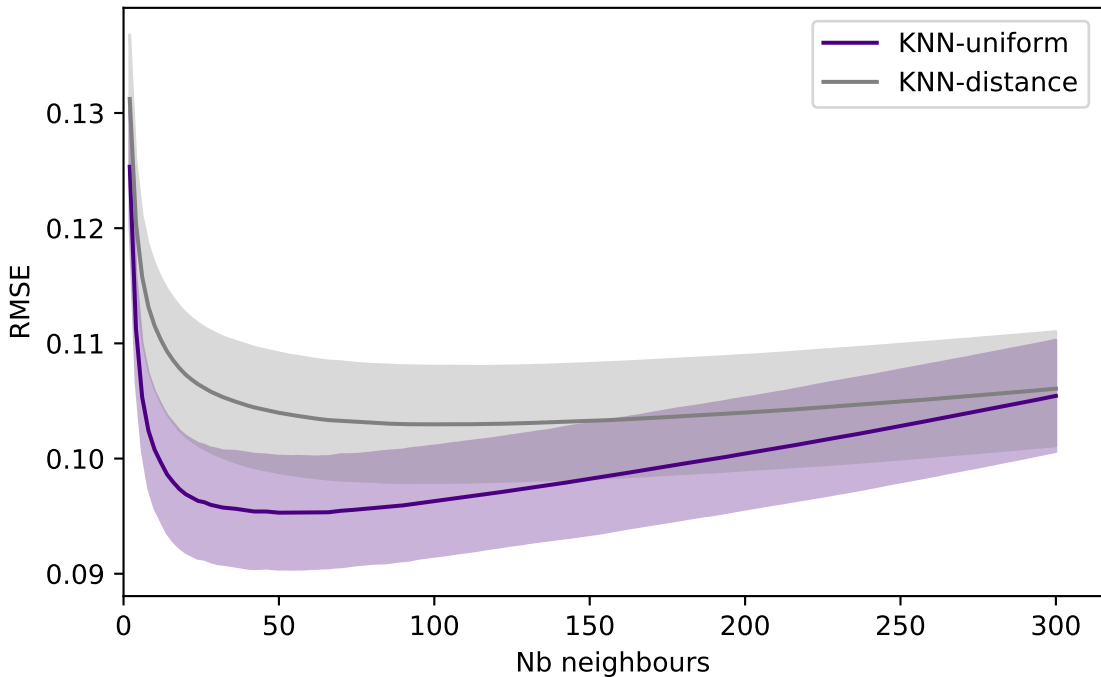

Supplement: supplementary_material [file attachment]

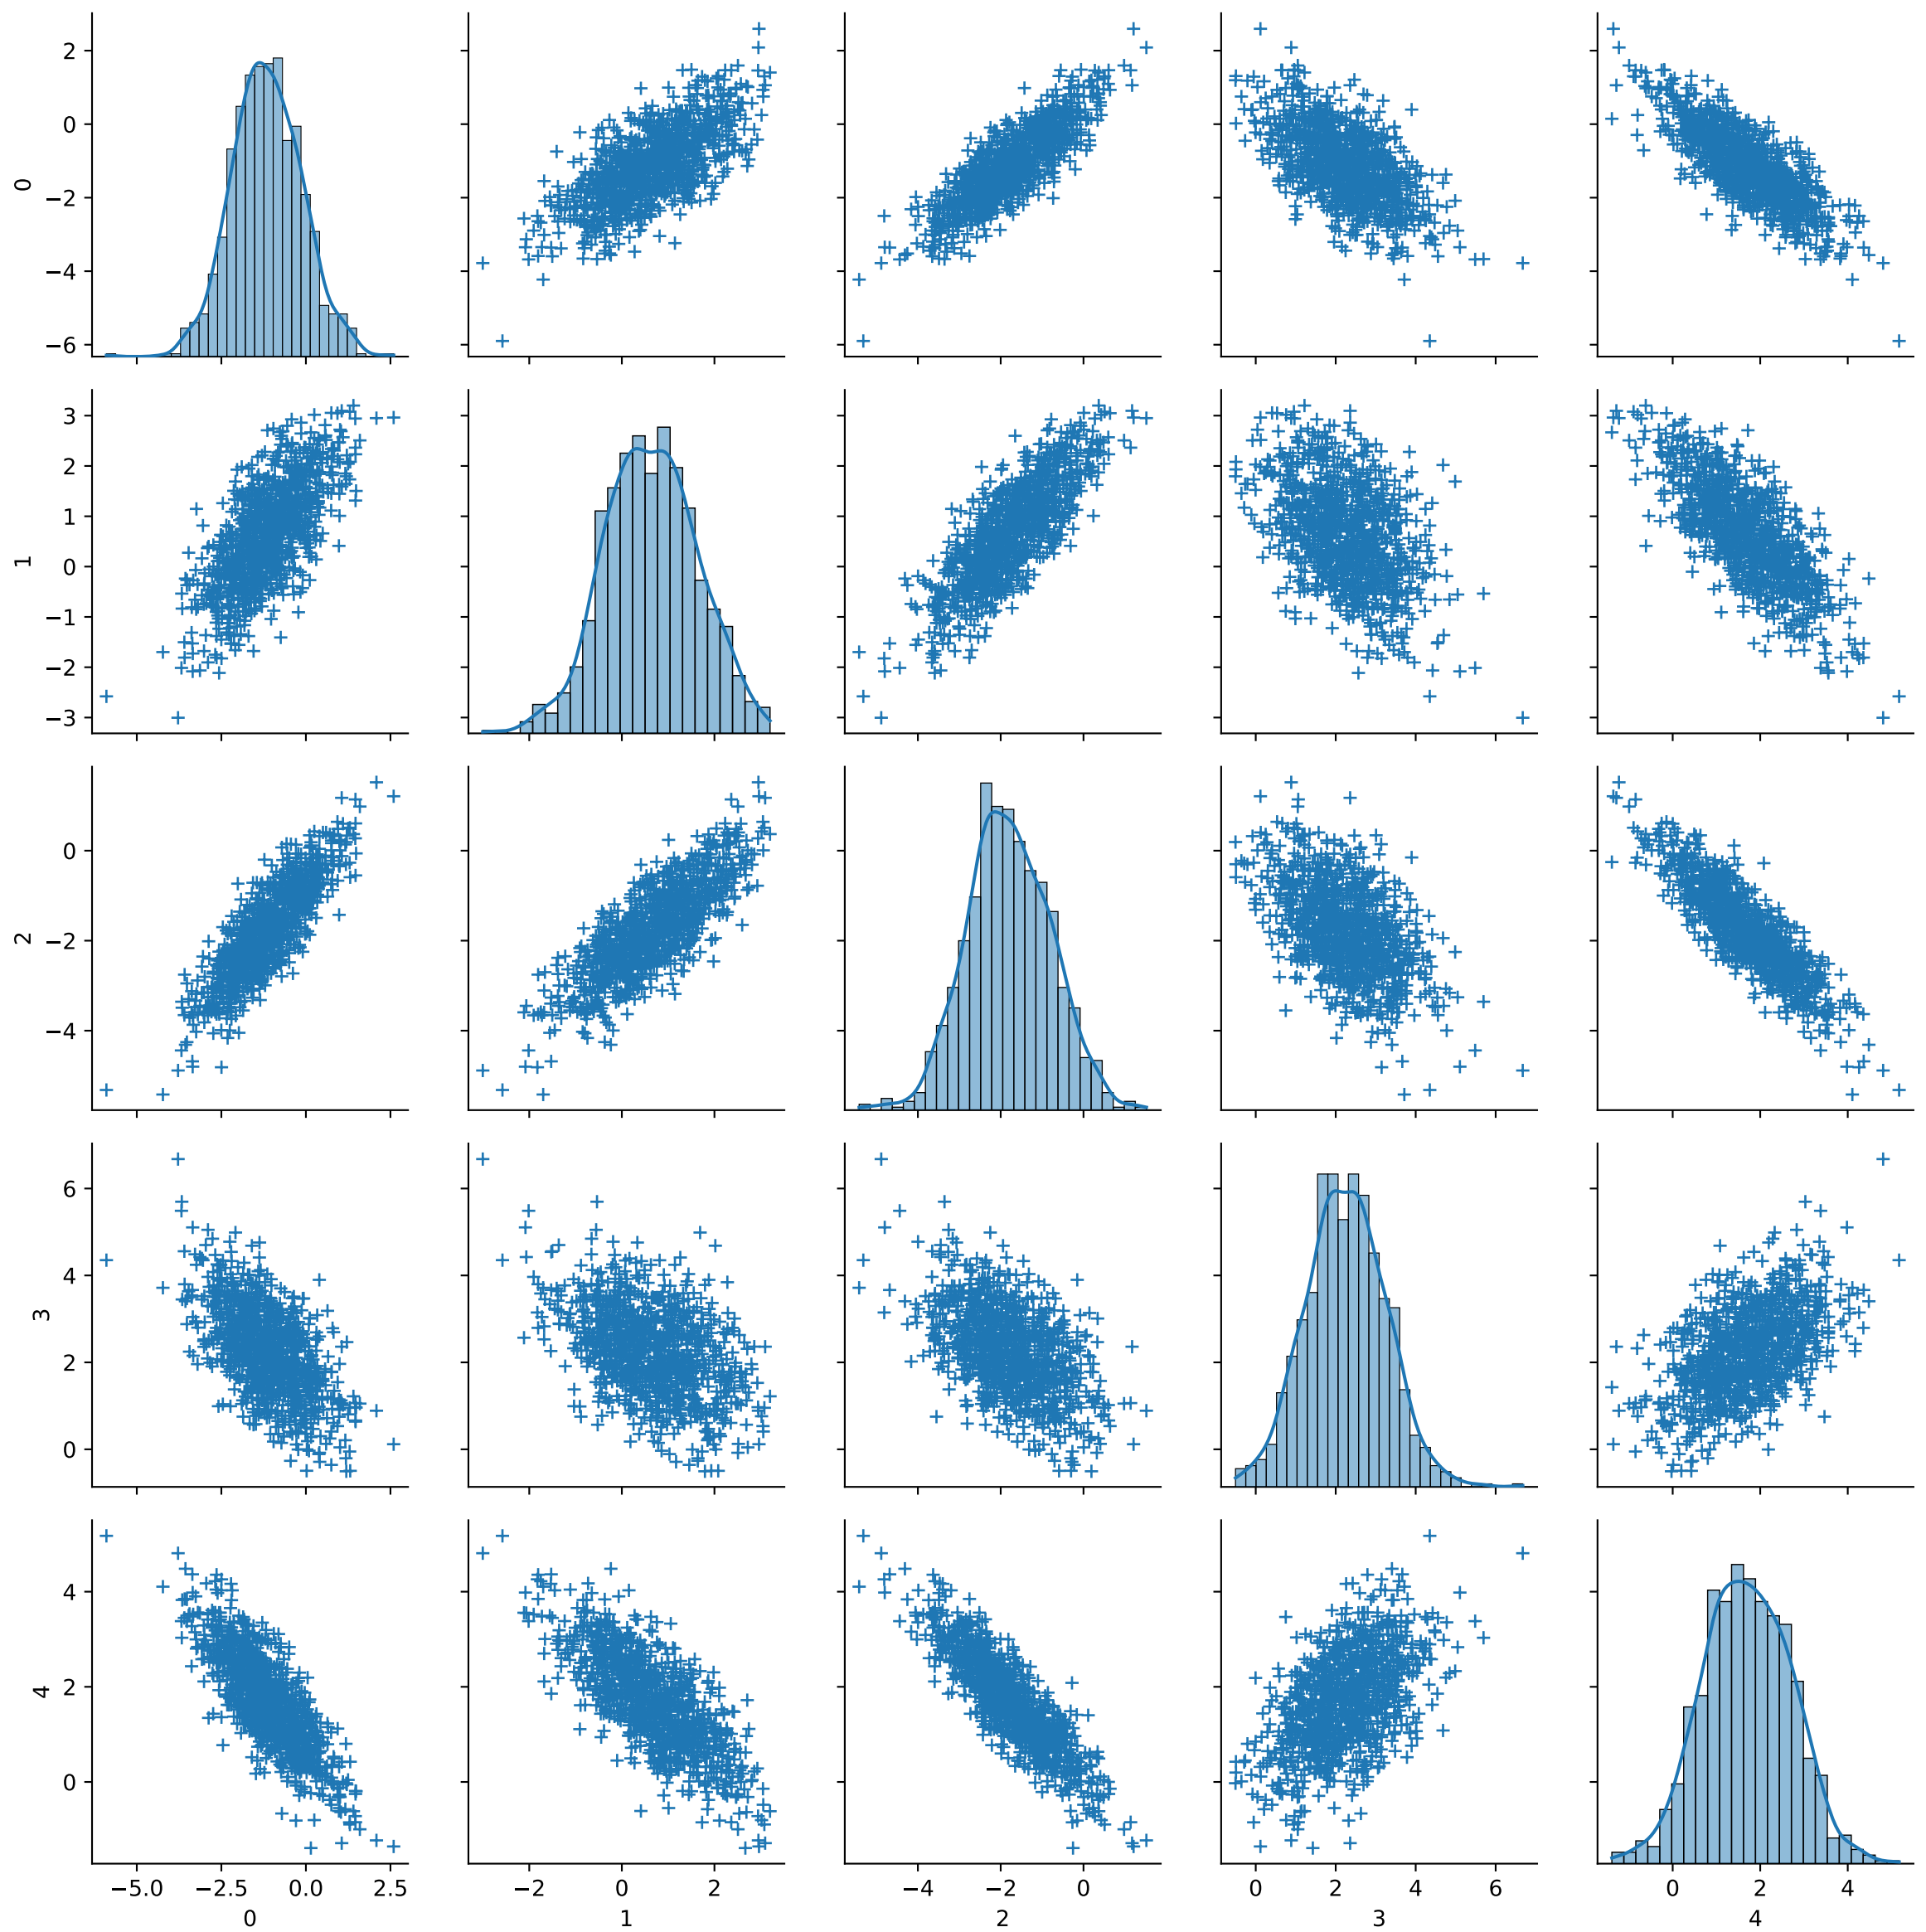

Supplement: supplementary_material [file attachment]

[MNAR setting] mean missing\_rate of 45%

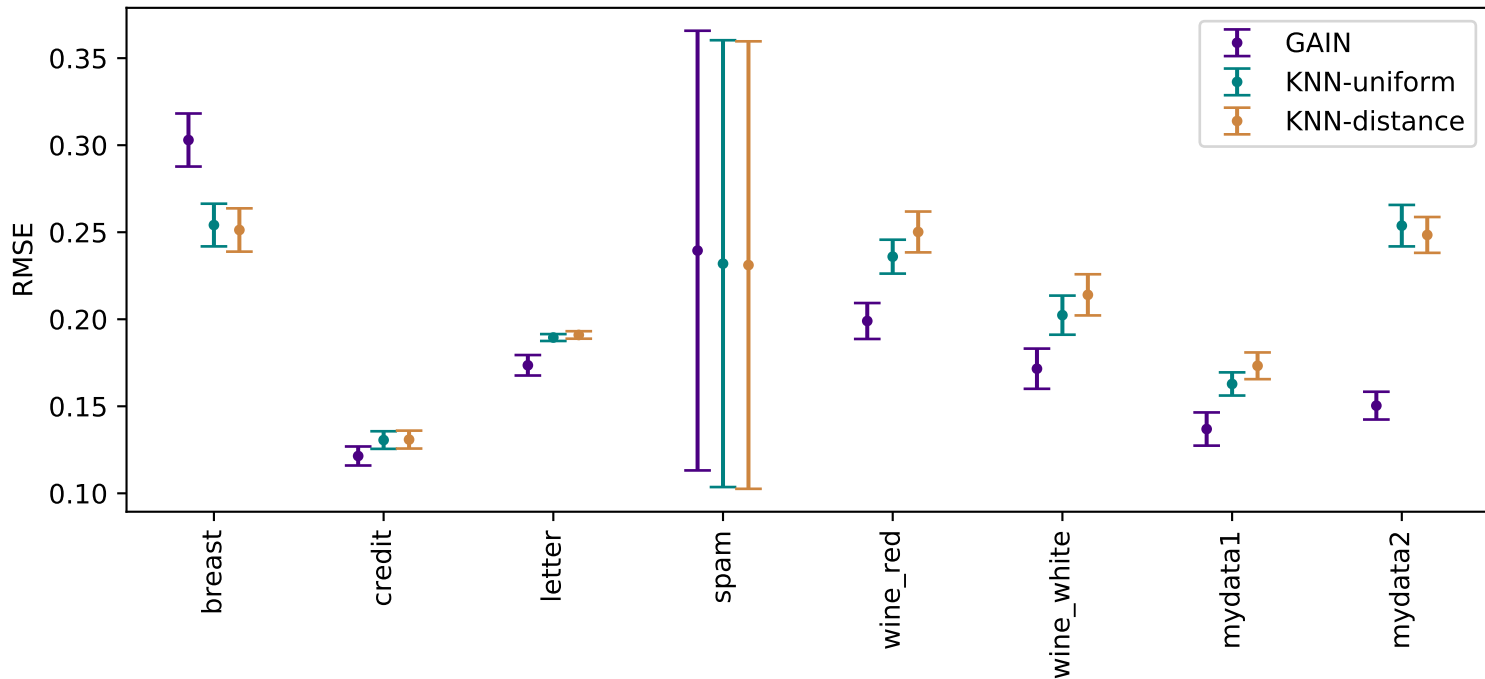

Supplement: supplementary_material [file attachment]

Multivariate Gaussian dataset [1000x5]

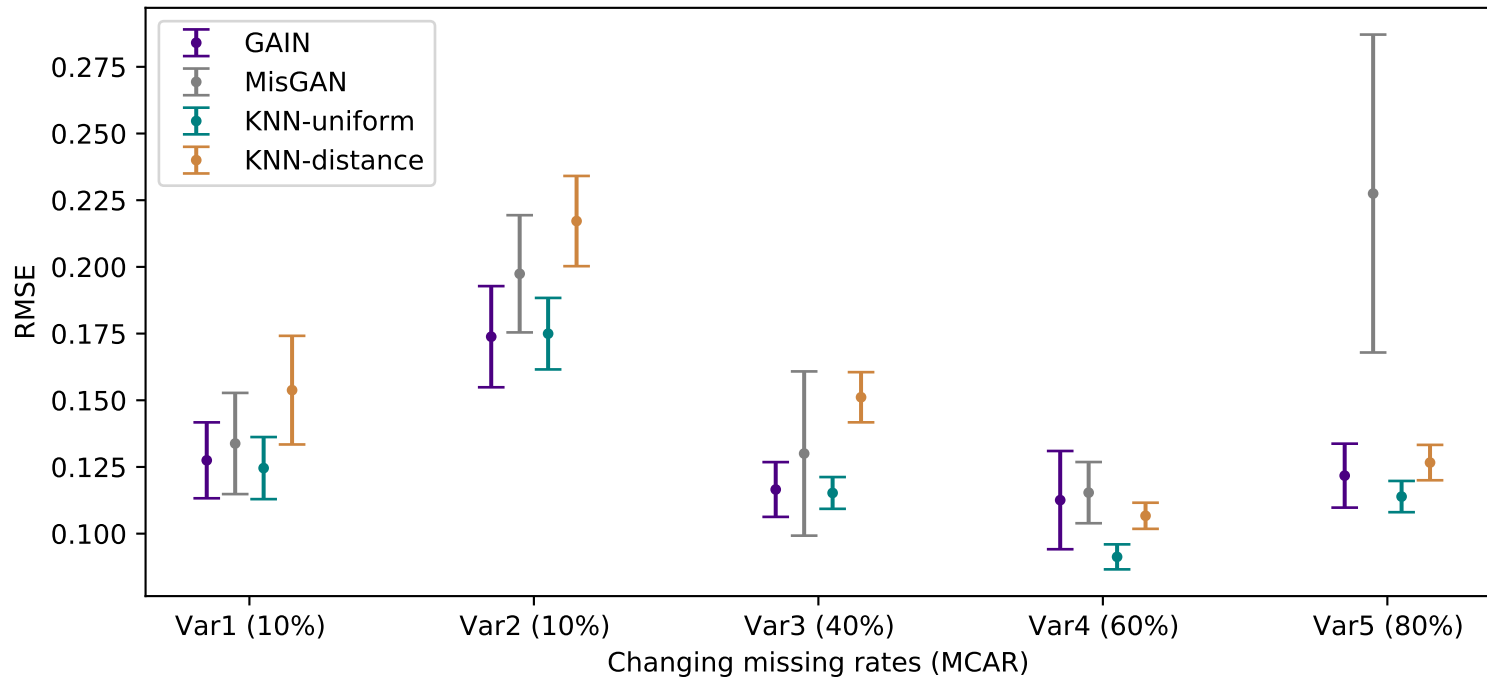

Supplement: supplementary_material [file attachment]

[MNAR setting] mean missing\_rate of 45%

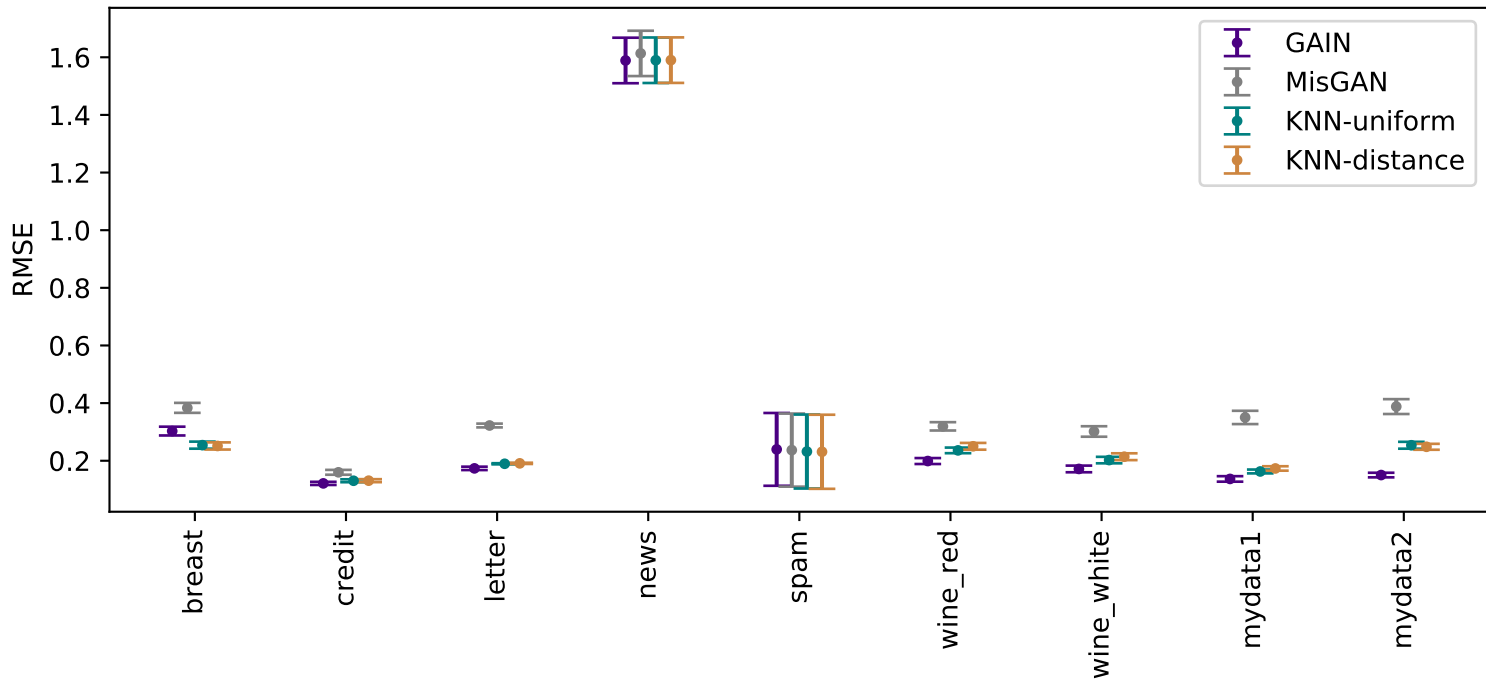

Supplement: supplementary_material [file attachment]

[MNAR setting] mean missing\_rate of 20%

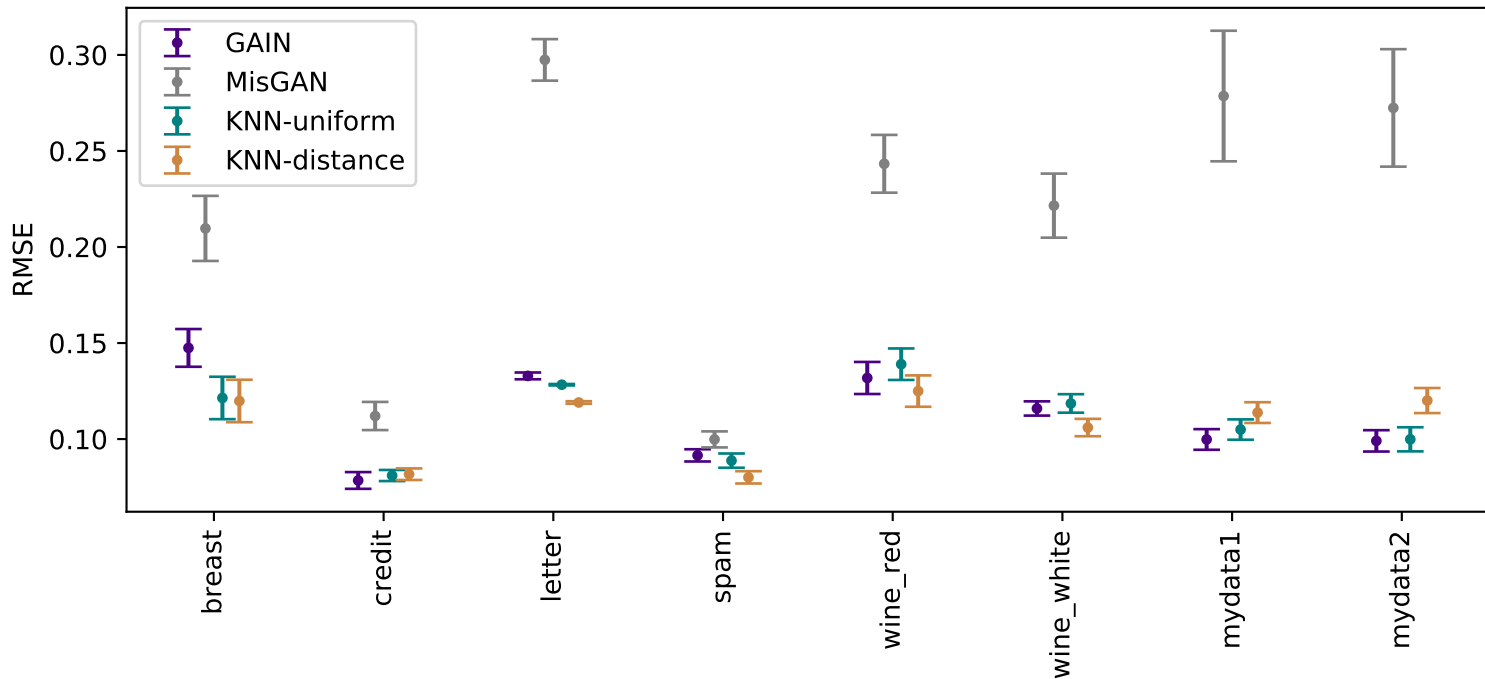

Supplement: supplementary_material [file attachment]

Mixture of three Gaussian dataset [1000x5]

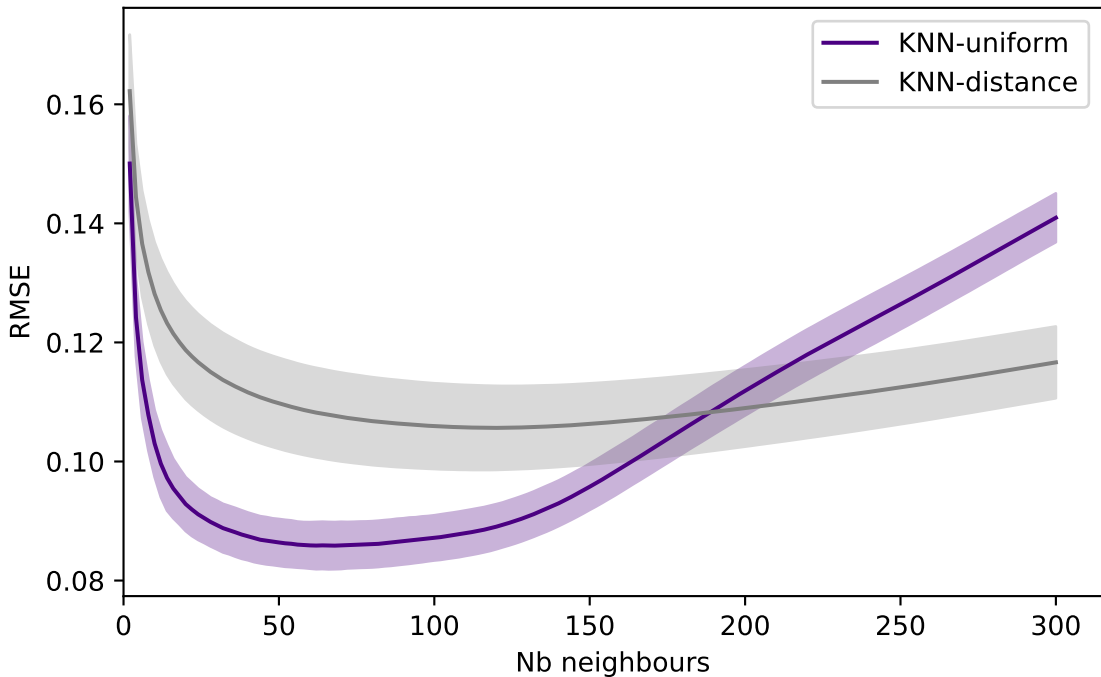

Supplement: supplementary_material [file attachment]

Mixture of three Gaussian dataset [1000x5]

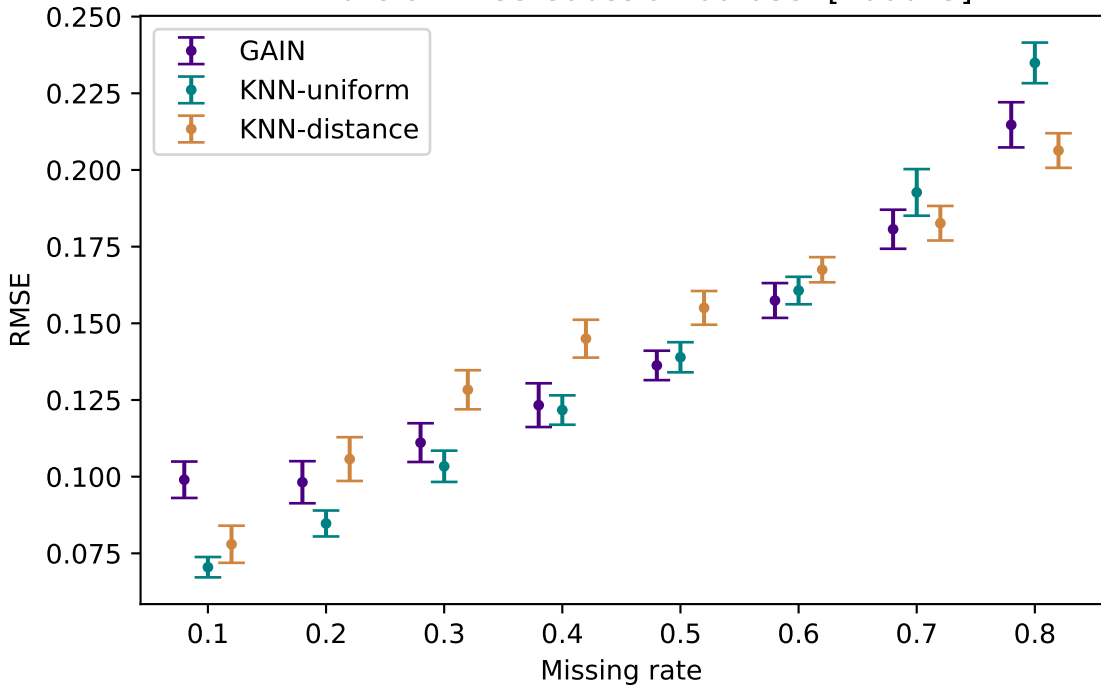

Supplement: supplementary_material [file attachment]

Missing rate 20% (MCAR)

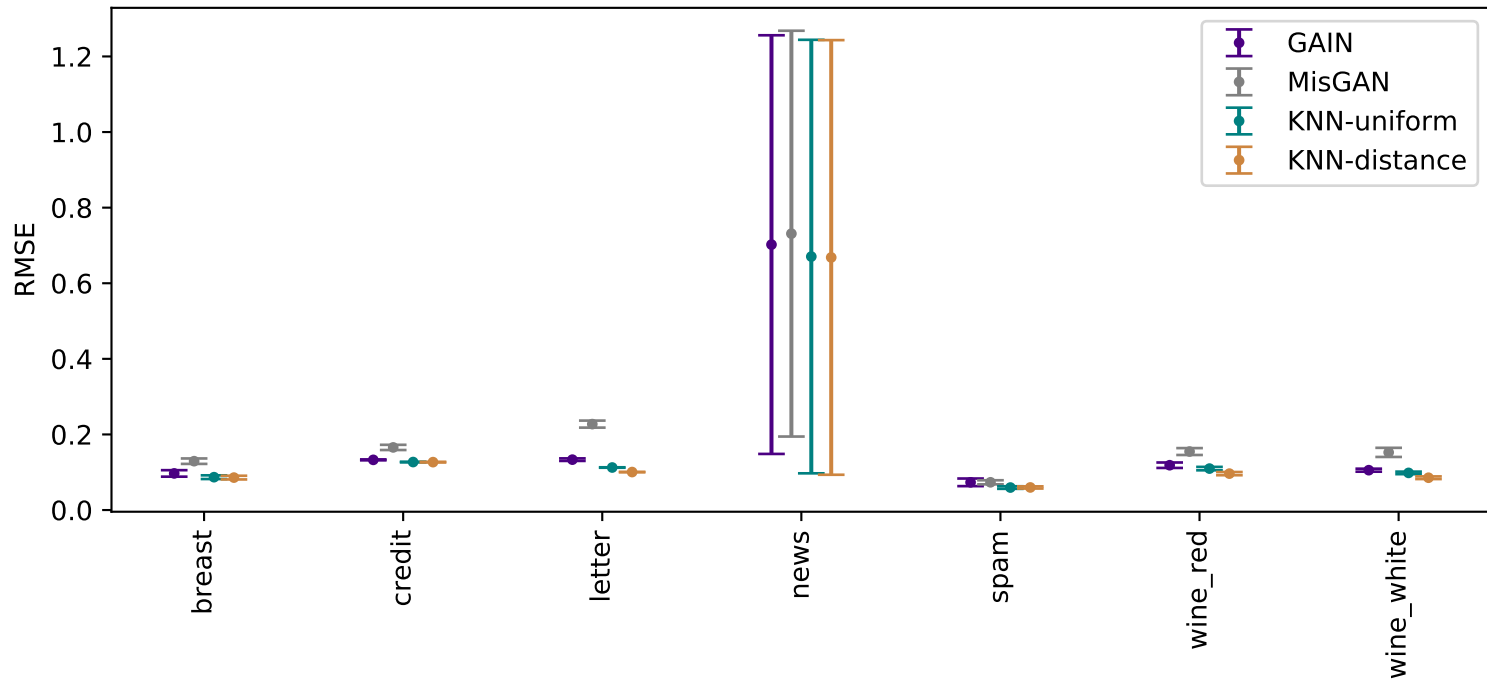

Supplement: supplementary_material [file attachment]

Missing rate 20% (MCAR)

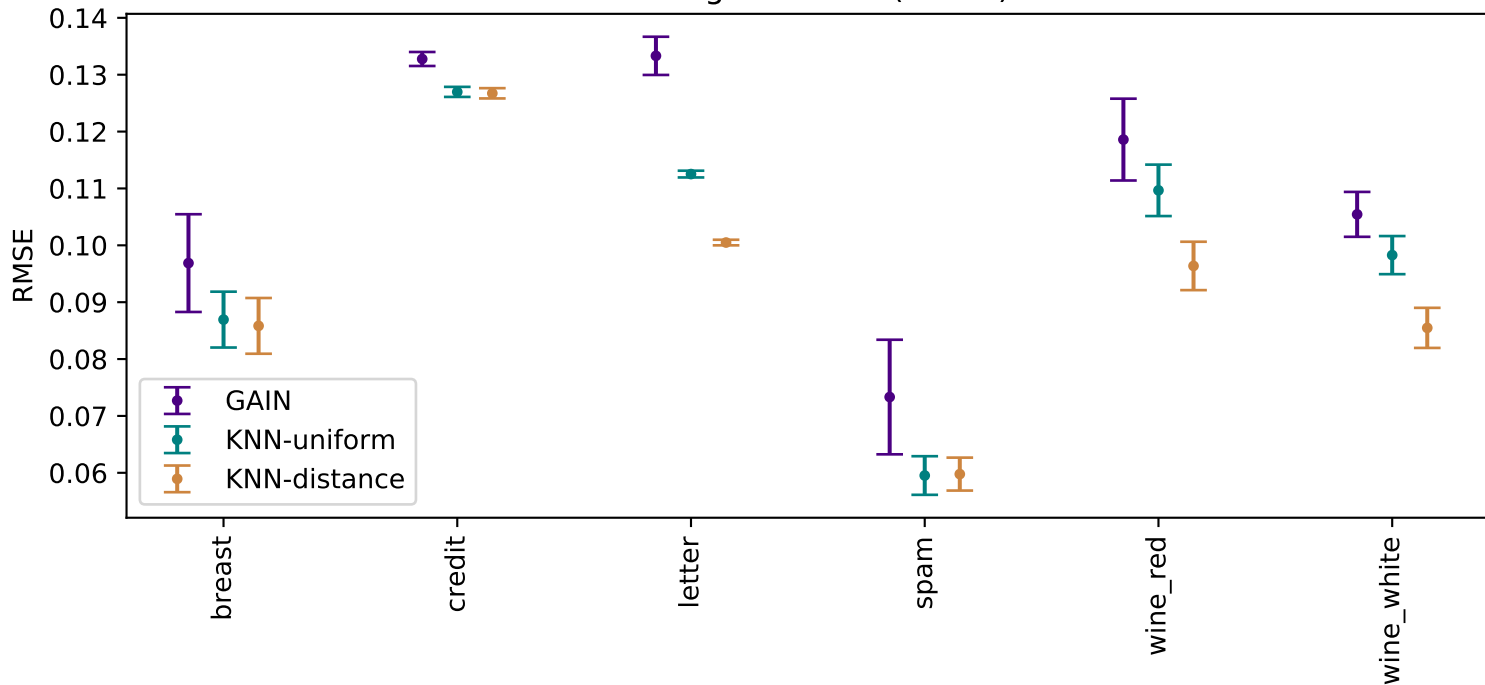

Supplement: supplementary_material [file attachment]

Multivariate Gaussian dataset [1000x5]

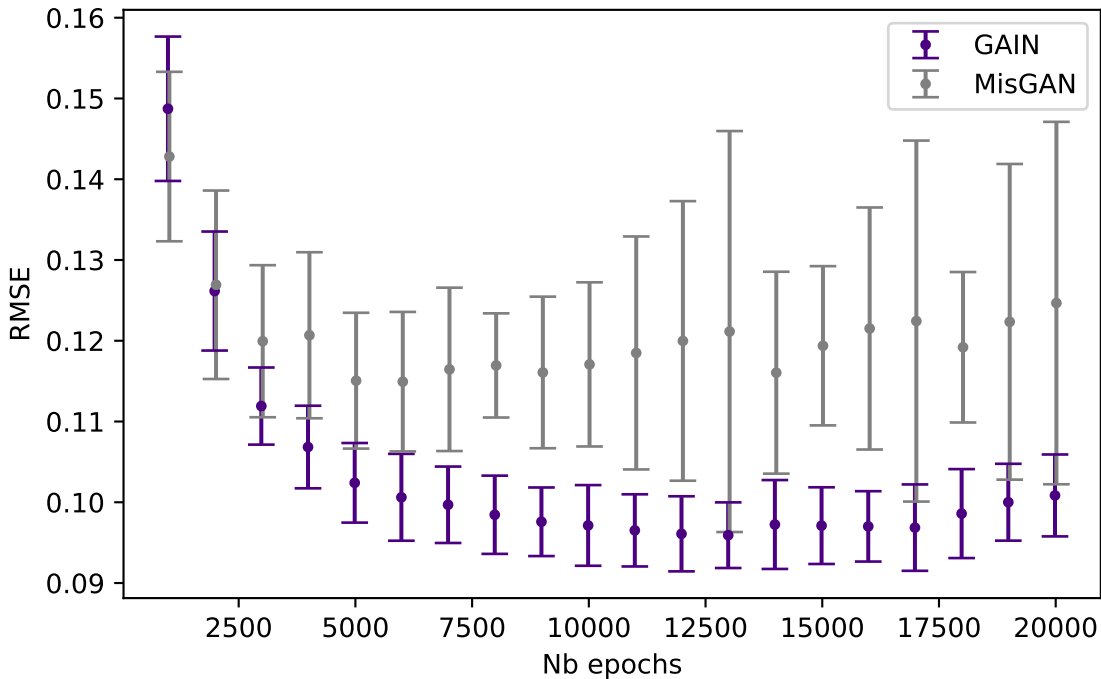

Supplement: supplementary_material [file attachment]

Multivariate Gaussian dataset [1000x5]

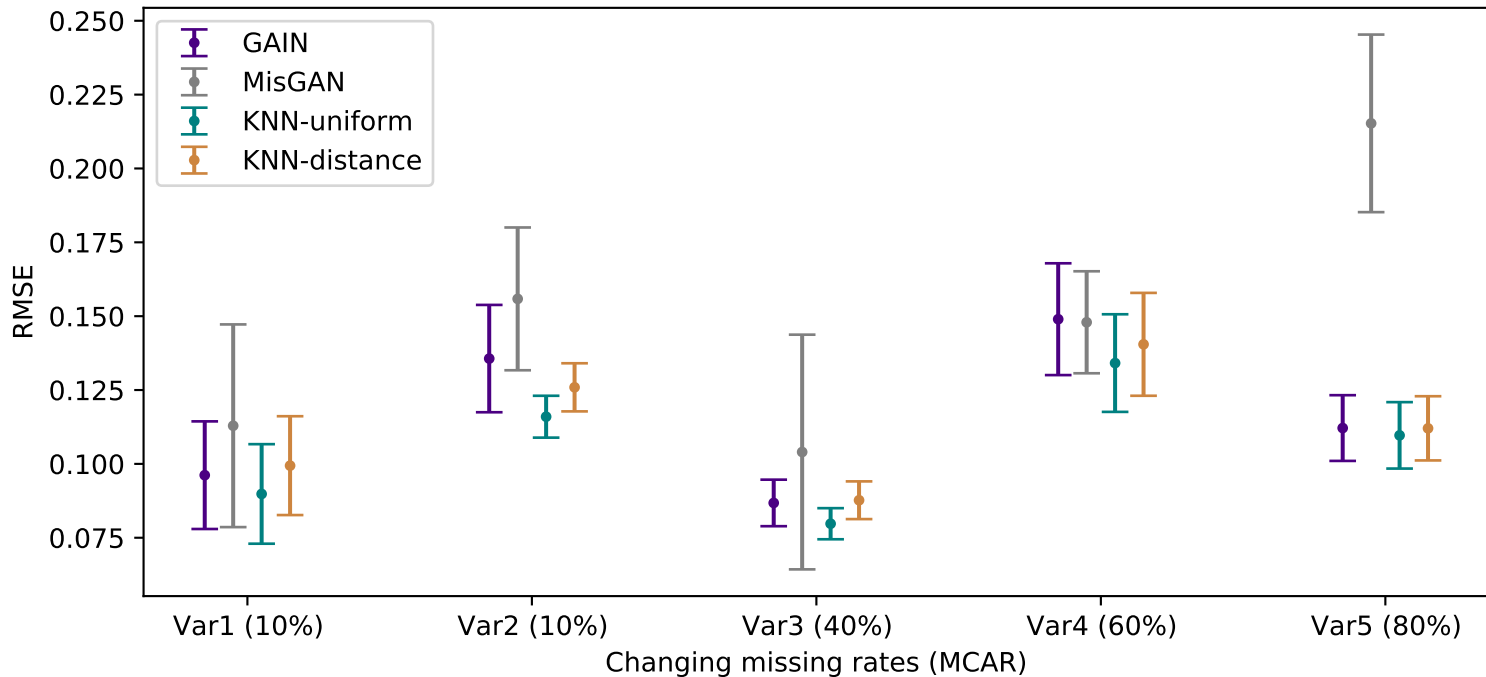

Supplement: supplementary_material [file attachment]

MAR scenario (based on first column)

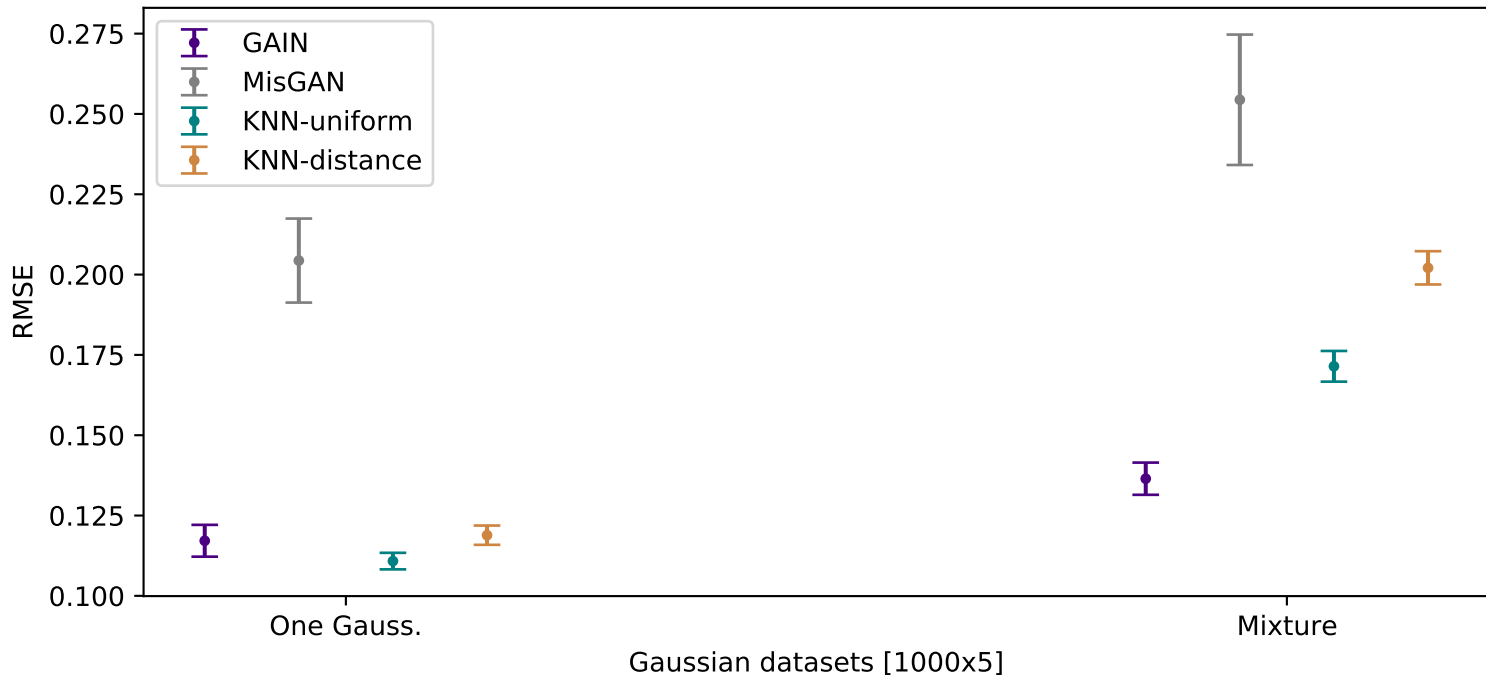

Supplement: supplementary_material [file attachment]

Mixture of three Gaussian dataset [1000x5]

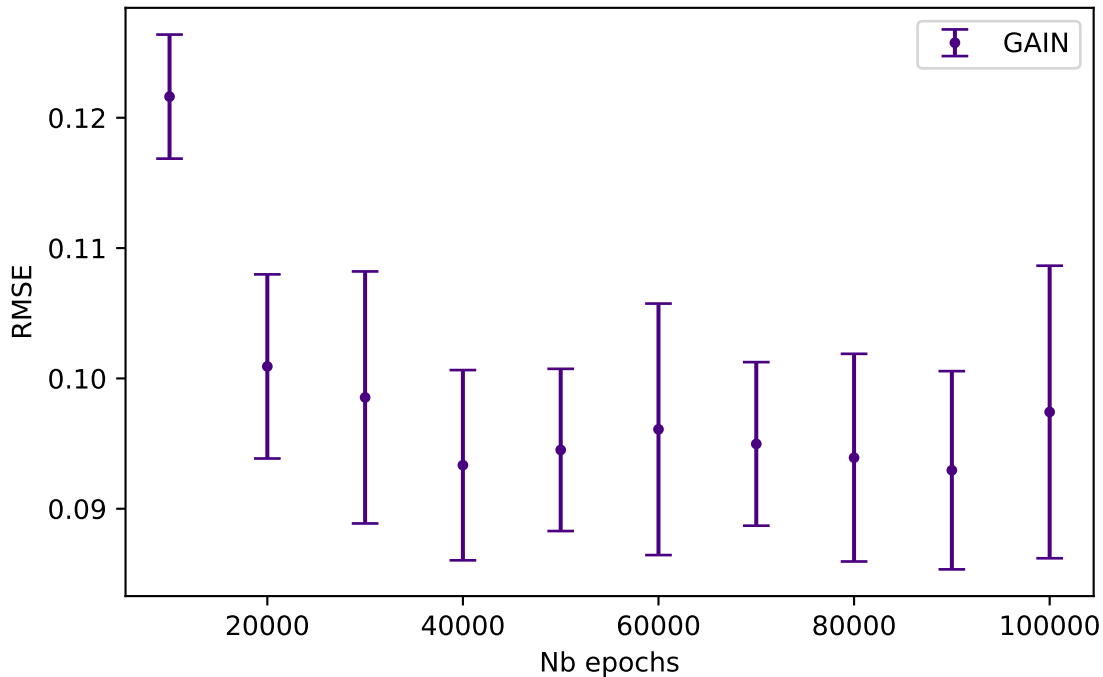

Supplement: supplementary_material [file attachment]

[MAR setting] mean missing\_rate of 20%

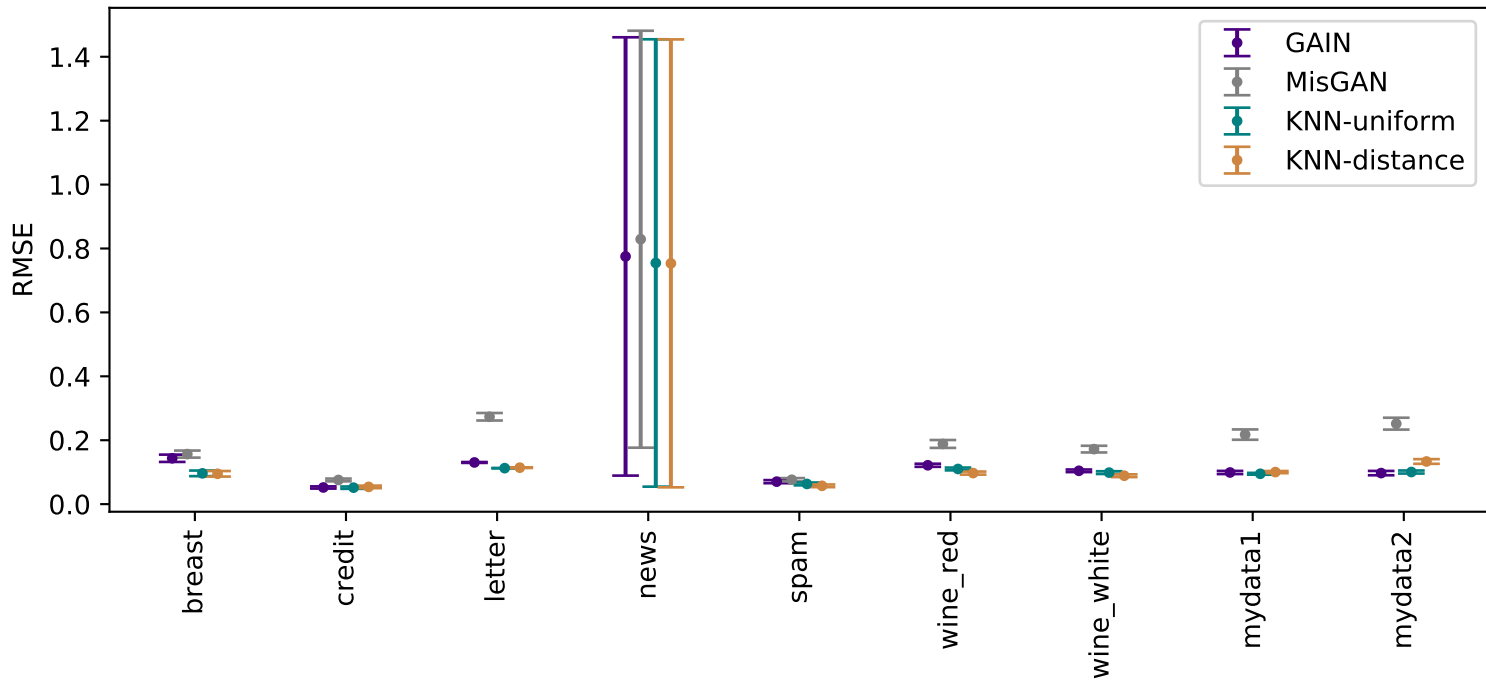

Supplement: supplementary_material [file attachment]

Mixture of three Gaussian dataset [1000x5]

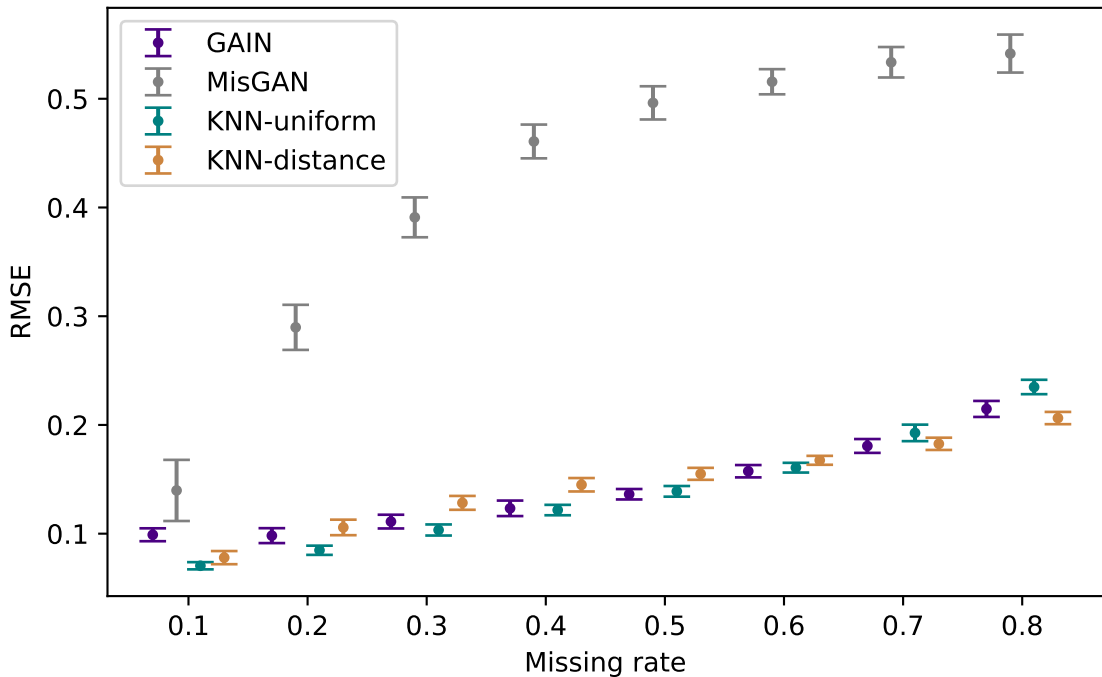

Supplement: supplementary_material [file attachment]

[MAR setting] mean missing\_rate of 20%

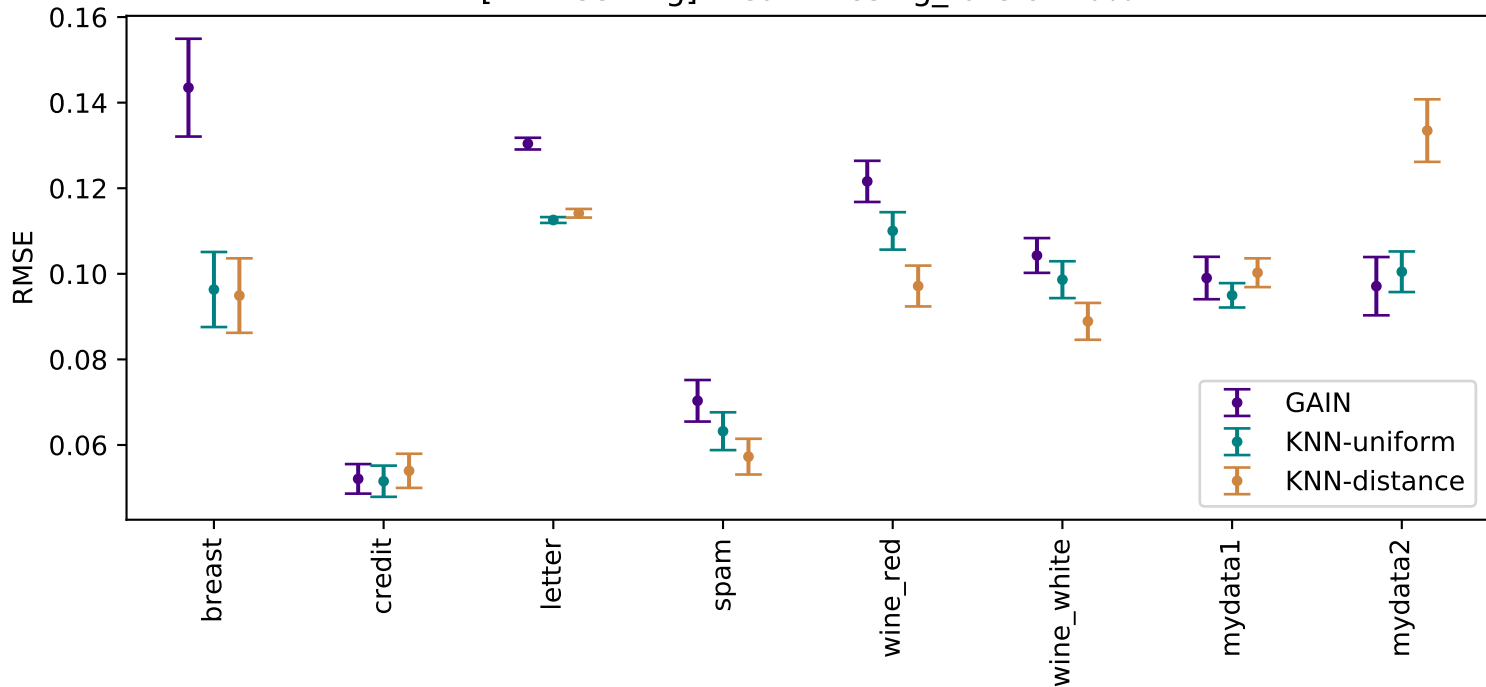

Supplement: supplementary_material [file attachment]

[MAR setting] mean missing\_rate of 45%

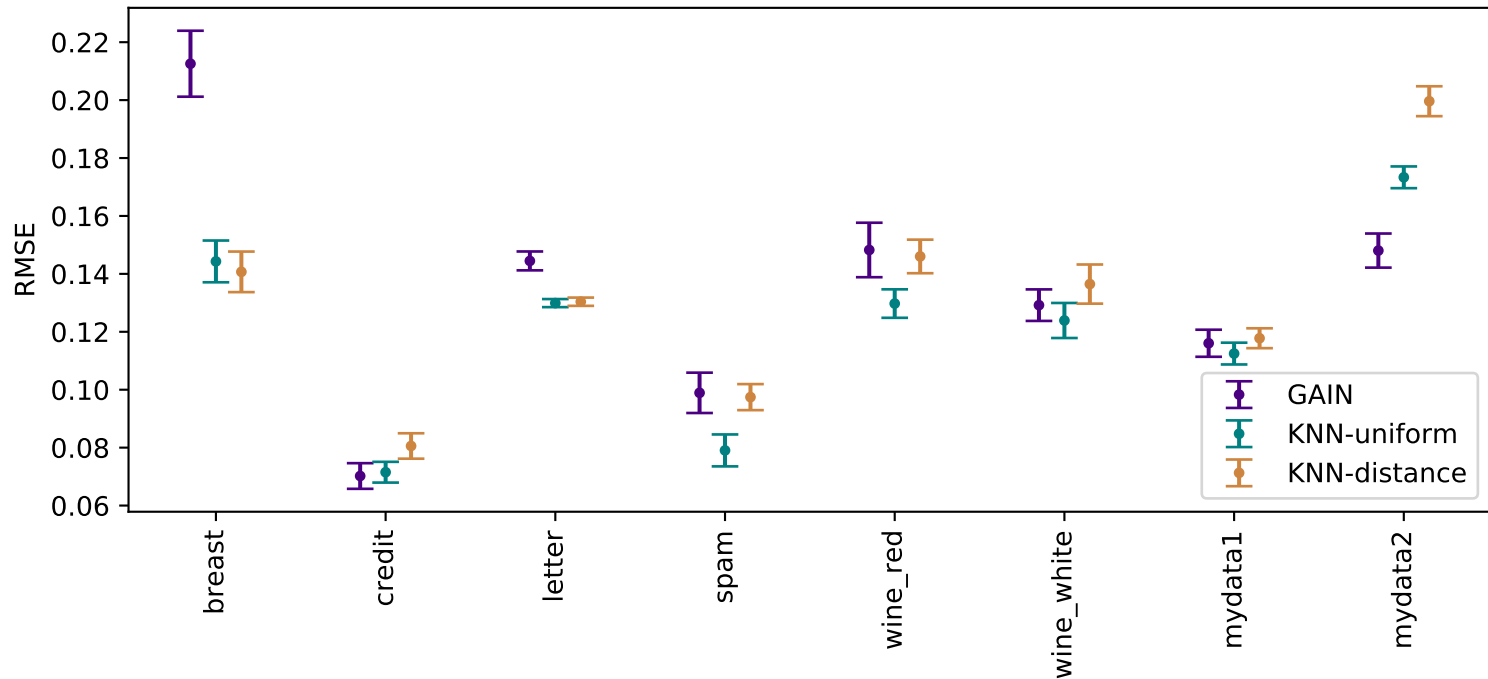

Supplement: supplementary_material [file attachment]

MAR scenario (based on first column)

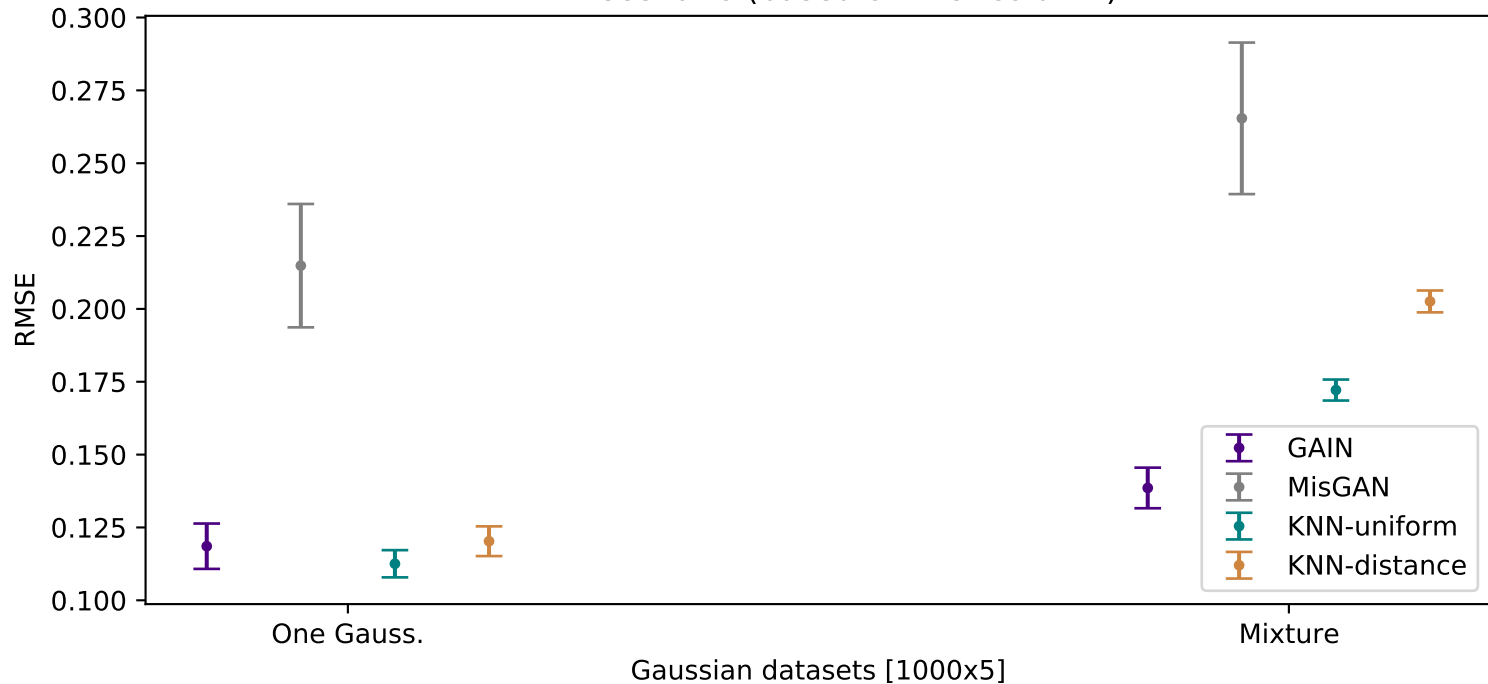

Supplement: supplementary_material [file attachment]

Missing rate 20% (MCAR)

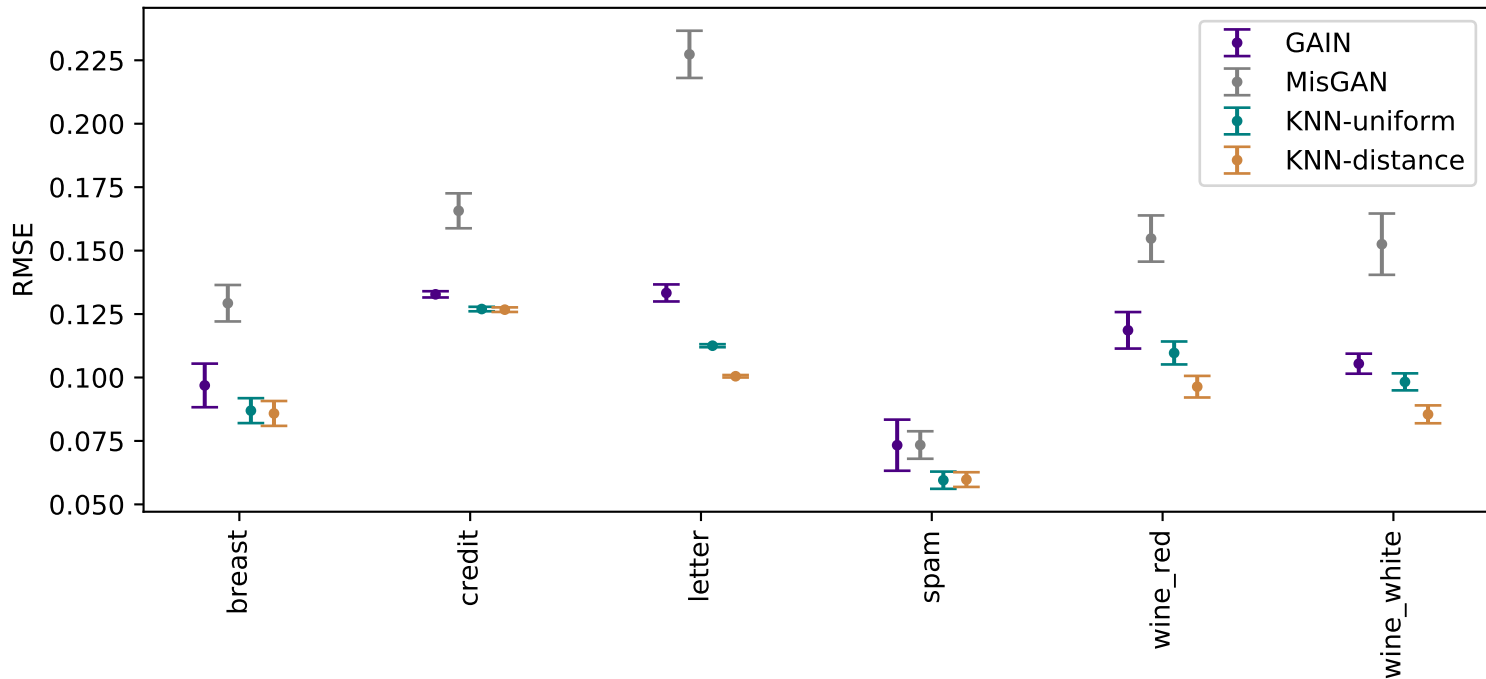

Supplement: supplementary_material [file attachment]

[MNAR setting] mean missing\_rate of 20%

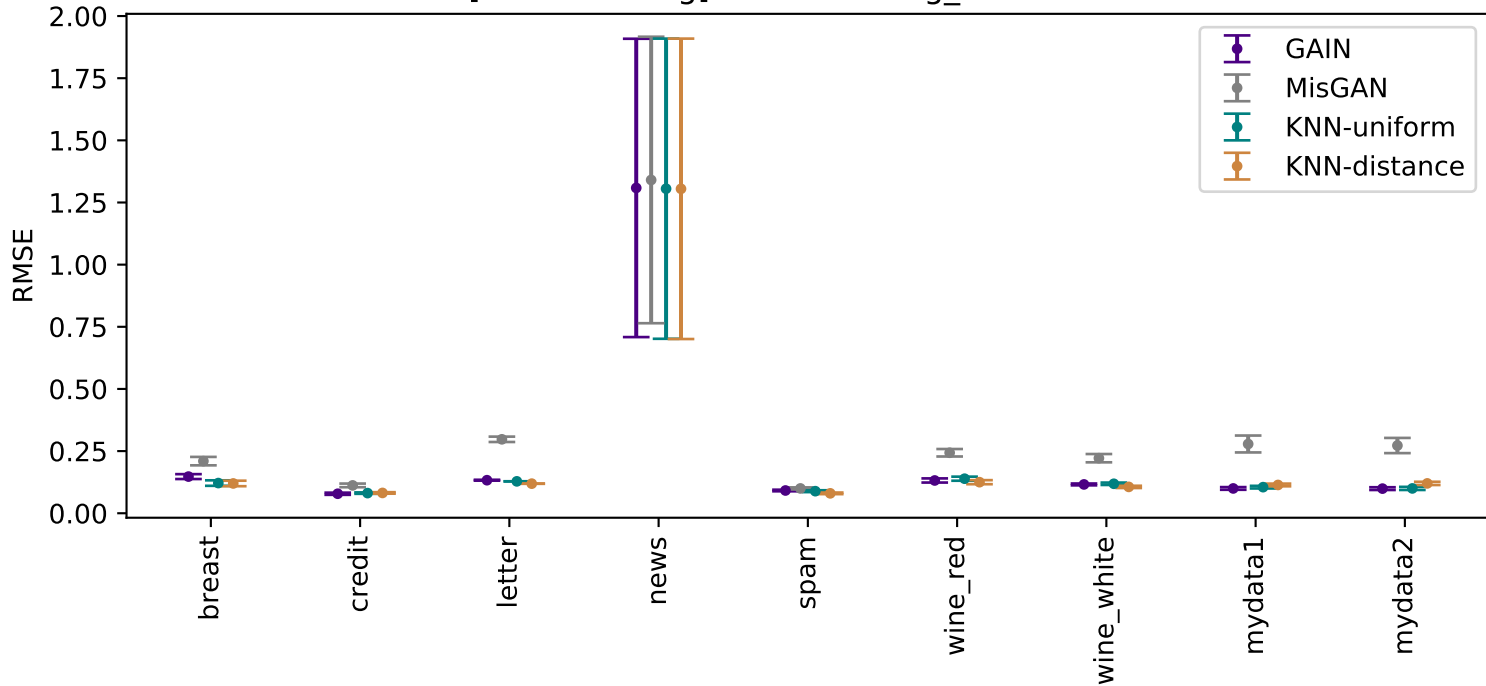

Supplement: supplementary_material [file attachment]

Mixture of three Gaussian dataset [1000x5]

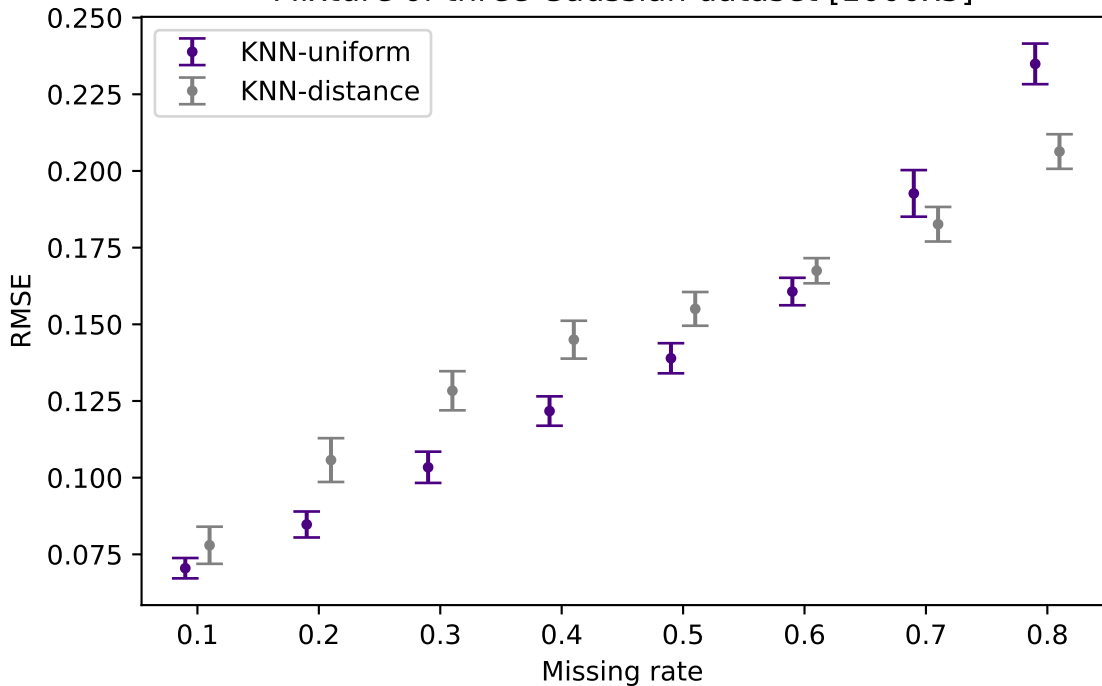

Supplement: supplementary_material [file attachment]

[MAR setting] mean missing\_rate of 45%

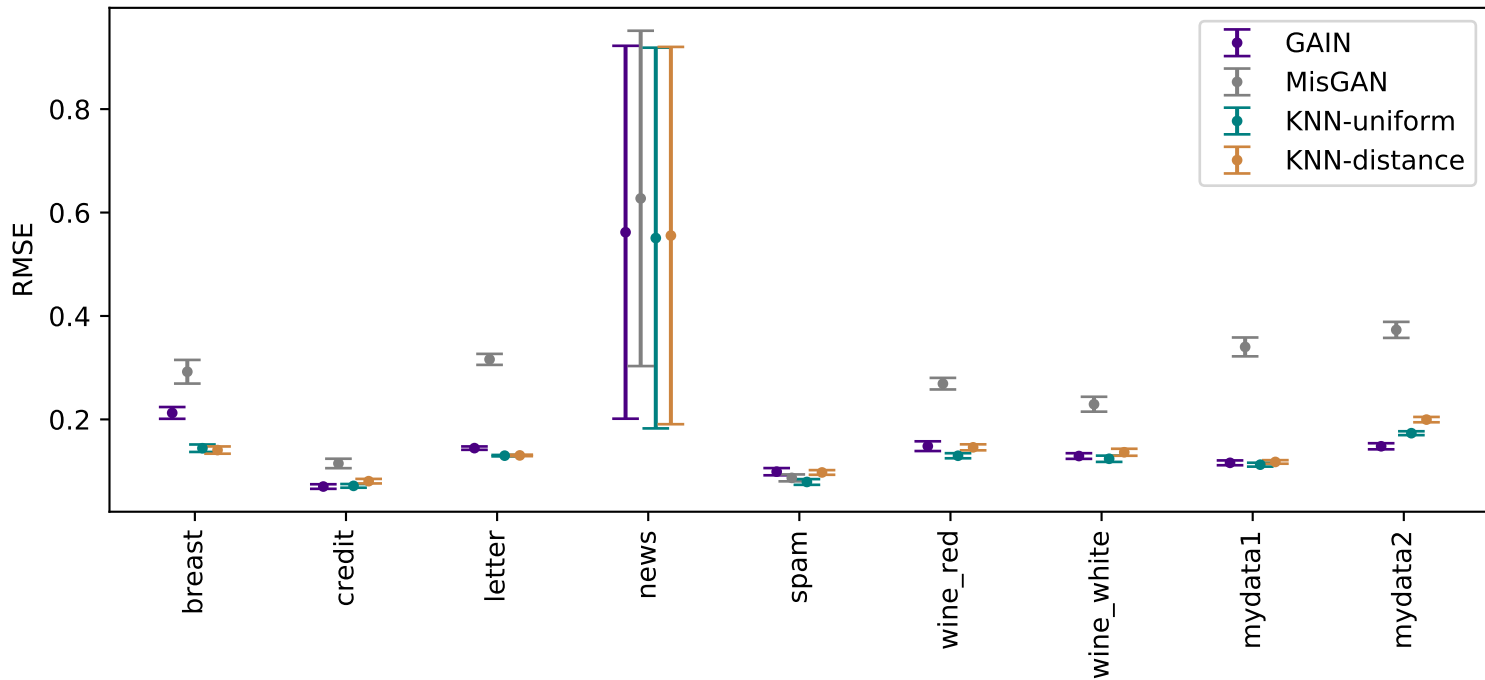

Supplement: supplementary_material [file attachment]

[MAR setting] mean missing\_rate of 20%

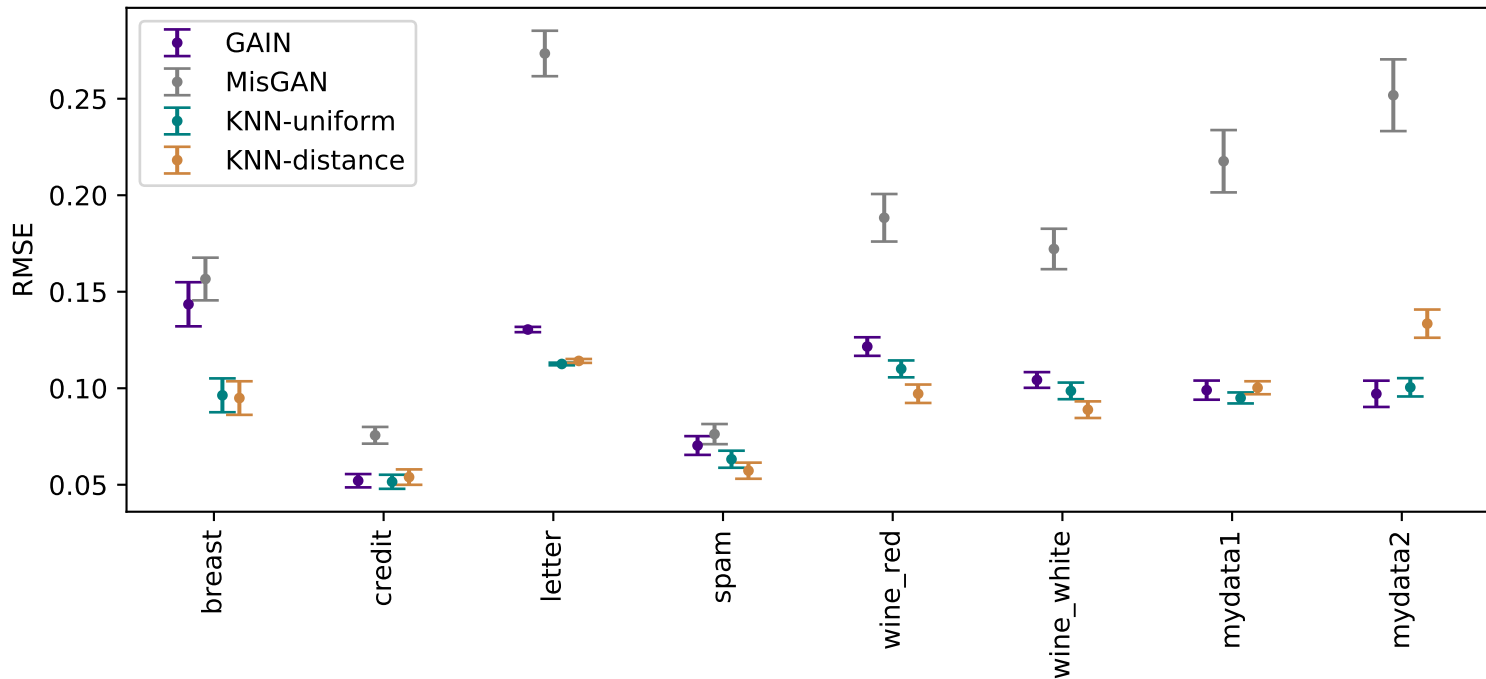

Supplement: supplementary_material [file attachment]

Mixture of three Gaussian dataset [1000x5]

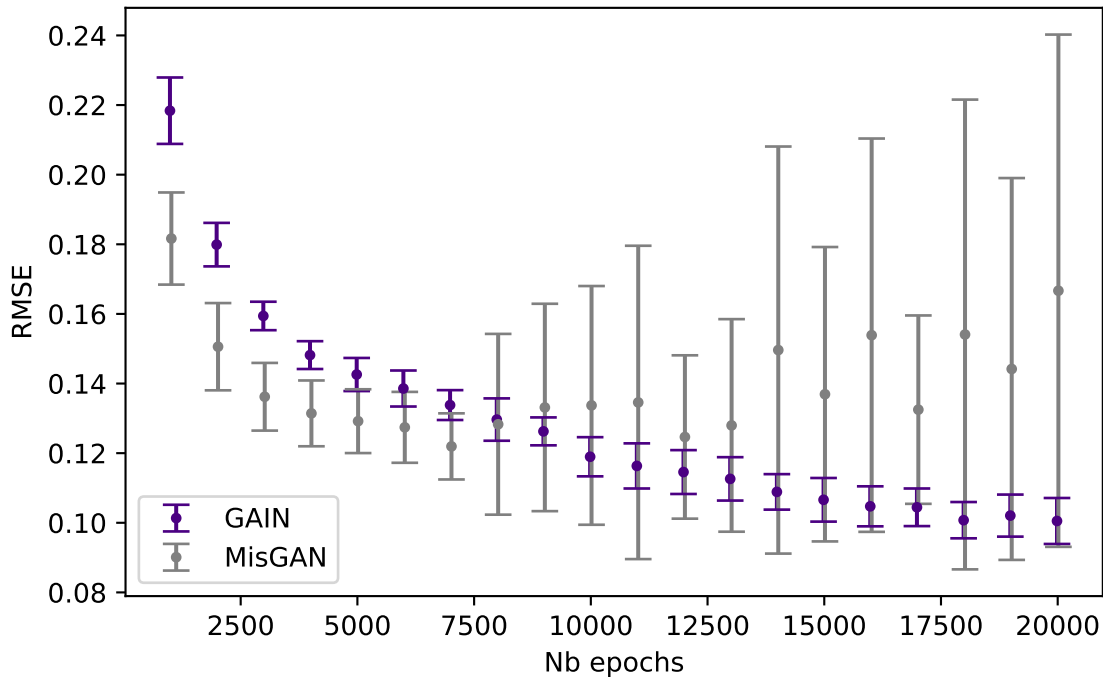

Supplement: supplementary_material [file attachment]

Mixture of three Gaussian dataset [1000x5]

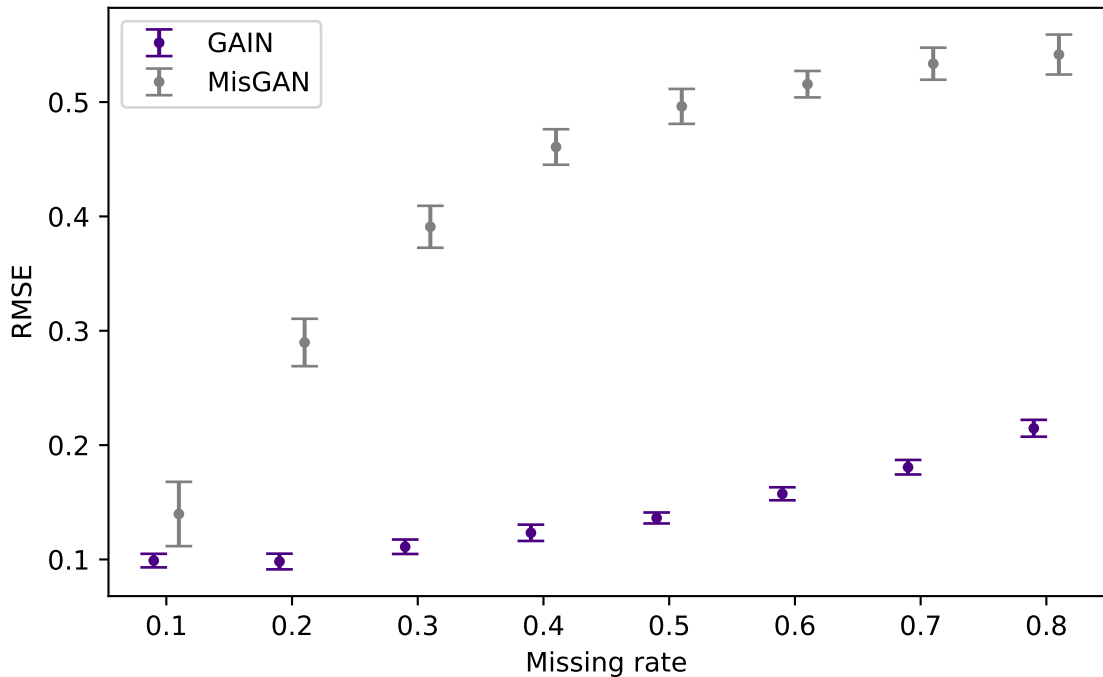

Supplement: supplementary_material [file attachment]

[MAR setting] mean missing\_rate of 45%

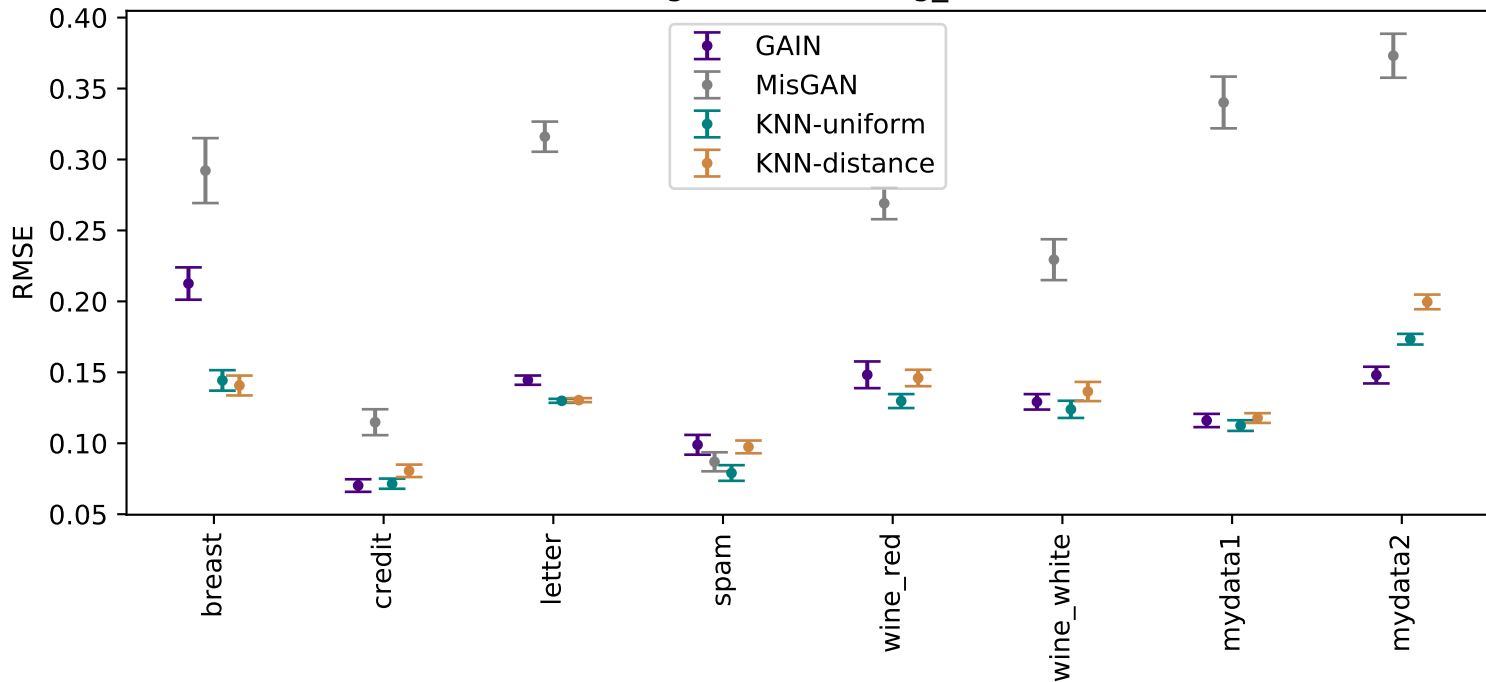

Supplement: supplementary_material [file attachment]

[MNAR setting] mean missing\_rate of 20%

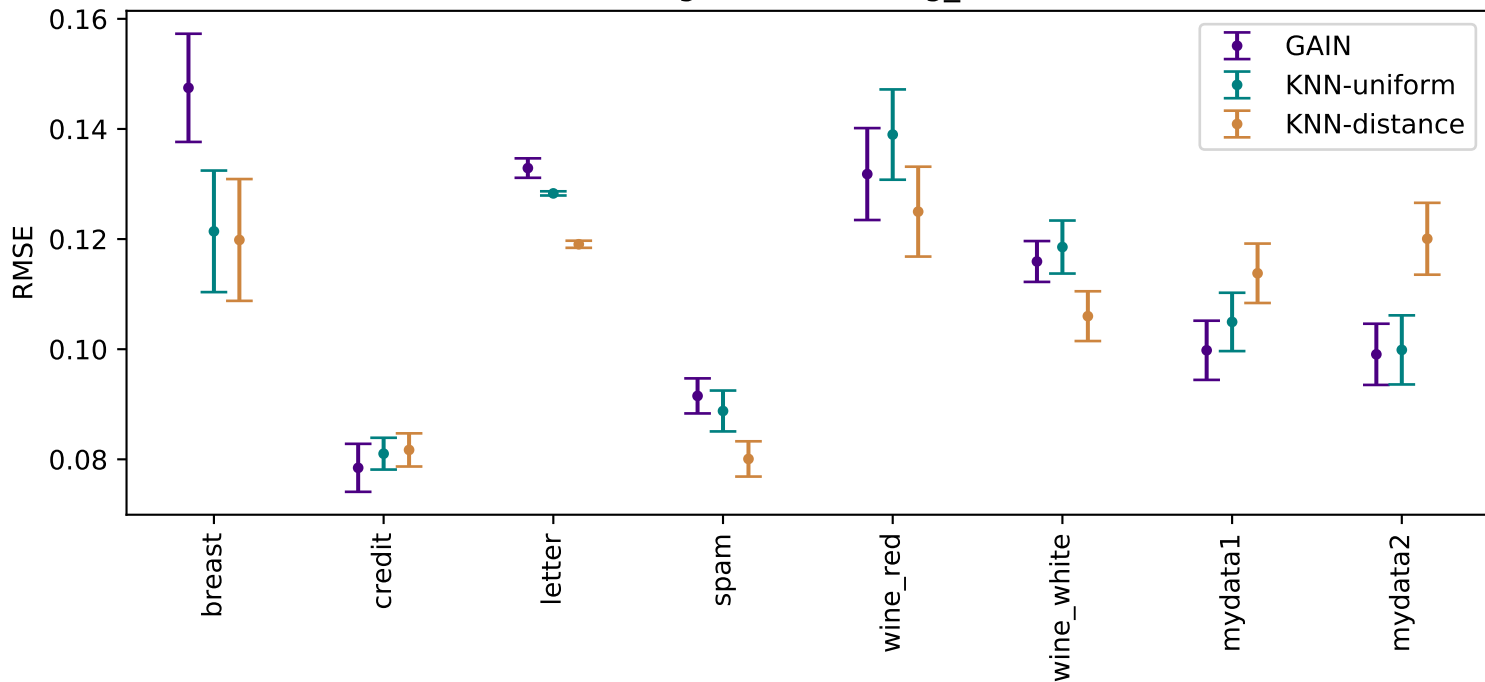

Supplement: supplementary_material [file attachment]

[MNAR setting] mean missing\_rate of 45%

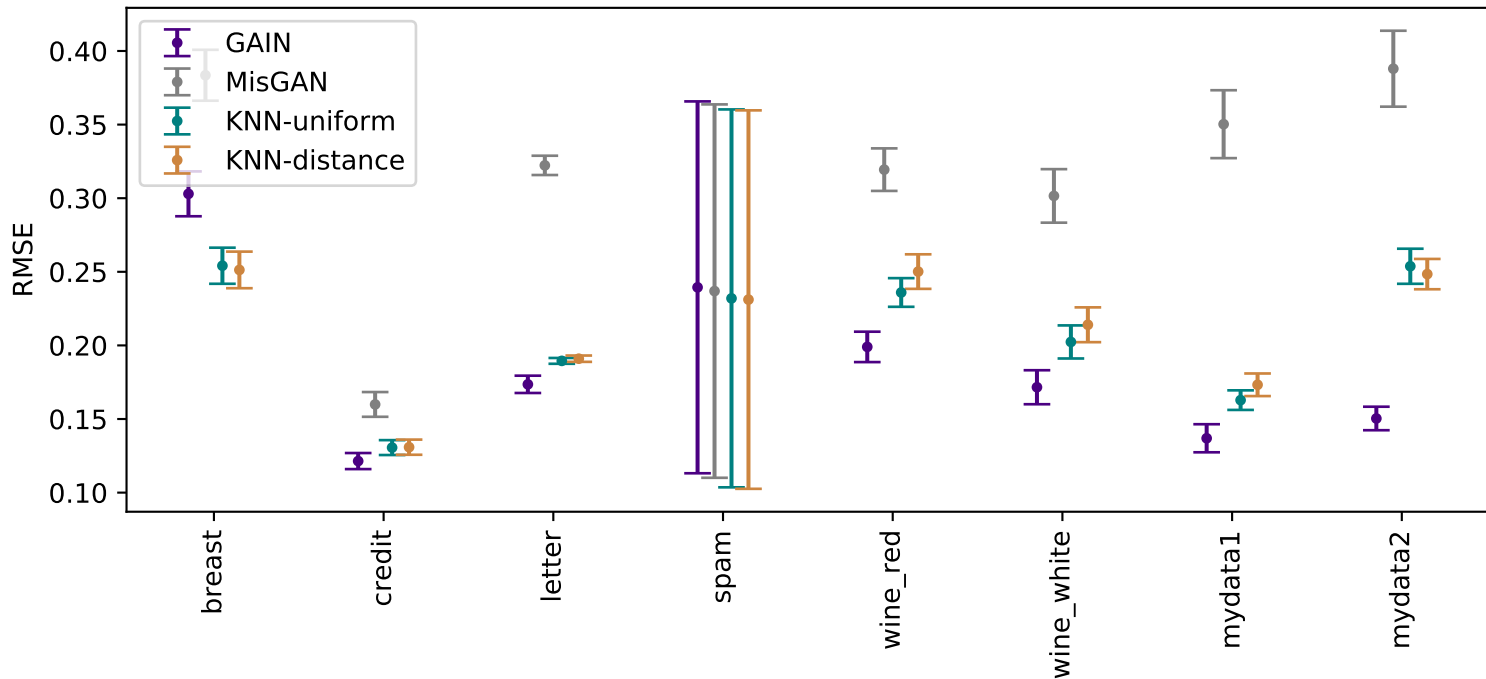

Supplement: supplementary_material [file attachment]

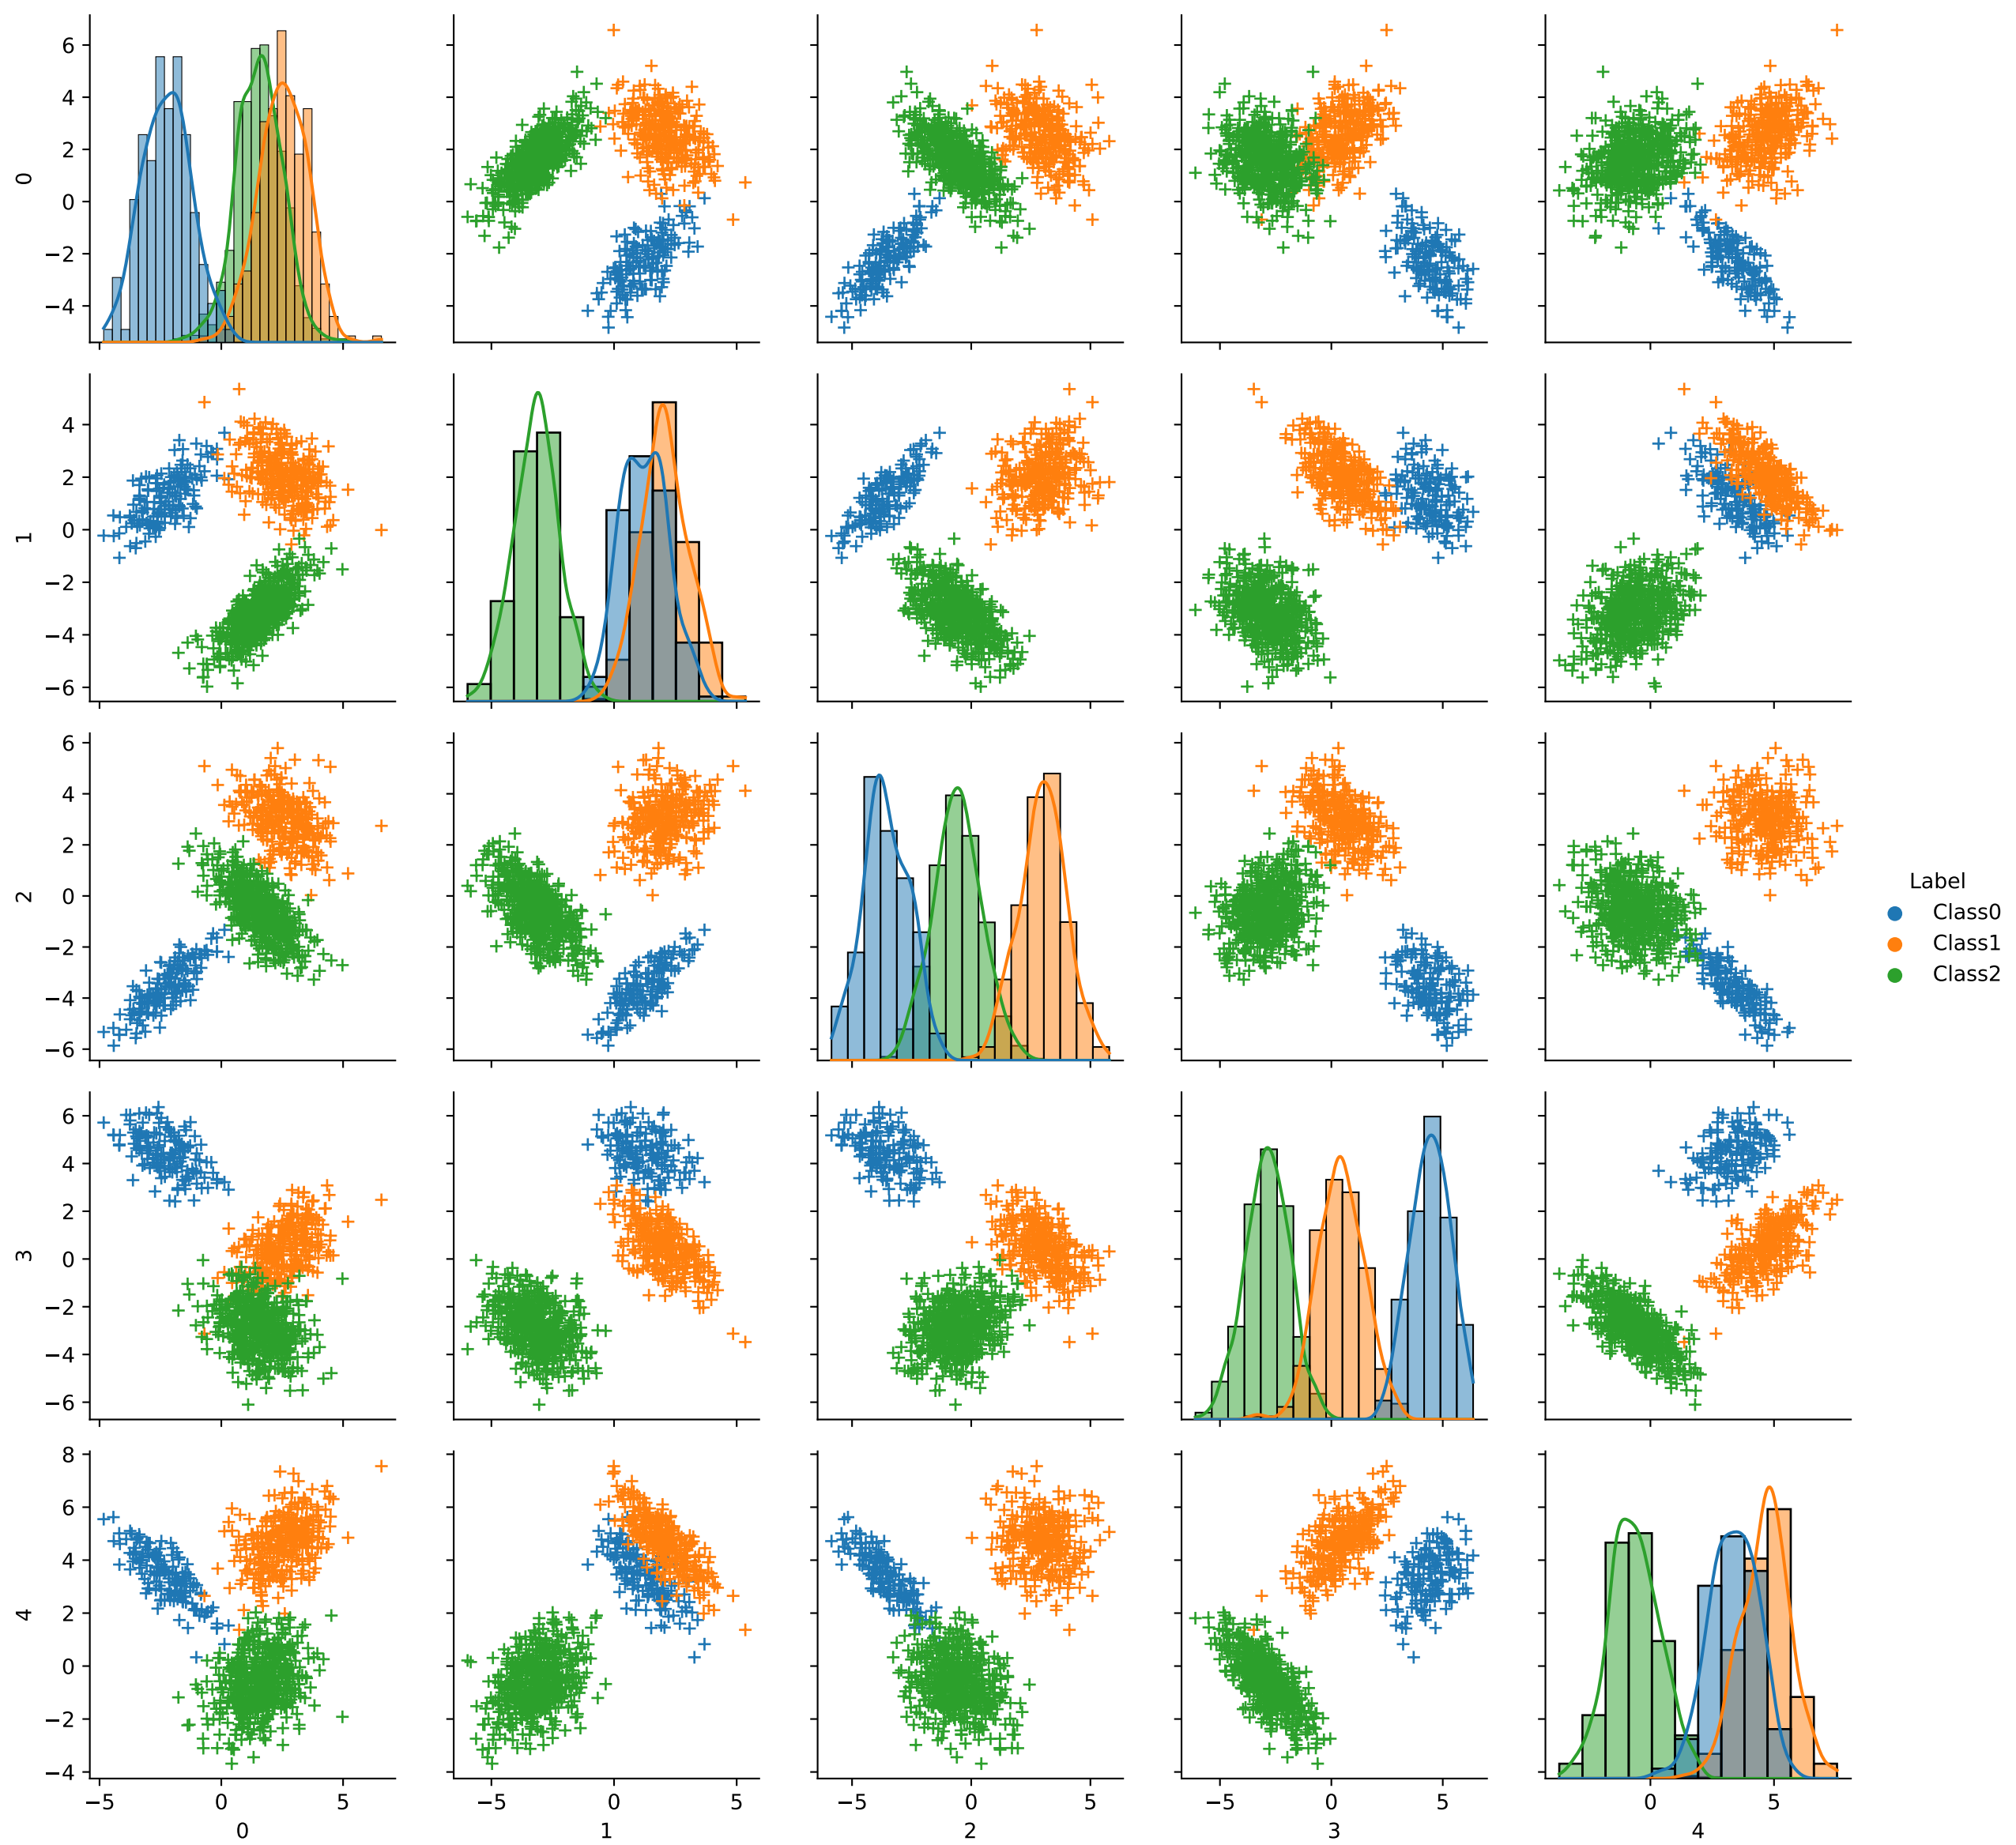

Supplement: supplementary_material [file attachment]
